# Supplementary material for: Threoninol as a scaffold of dyes (threoninol-nucleotide) and their stable interstrand clustering in duplexes
Source: Royal Society of Chemistry journal article supplement (doi:10.1039/b806406g), 2008-01-01
Supplement: b806406g.pdf [file b806406g.pdf]

## Electronic Supplementary Information

### Threoninol as a Scaffold of Dyes (Threoninol-nucleotide) and Their Stable Interstrand Clustering in Duplexes

Hiromu Kashida, Taiga Fujii and Hiroyuki Asanuma\*

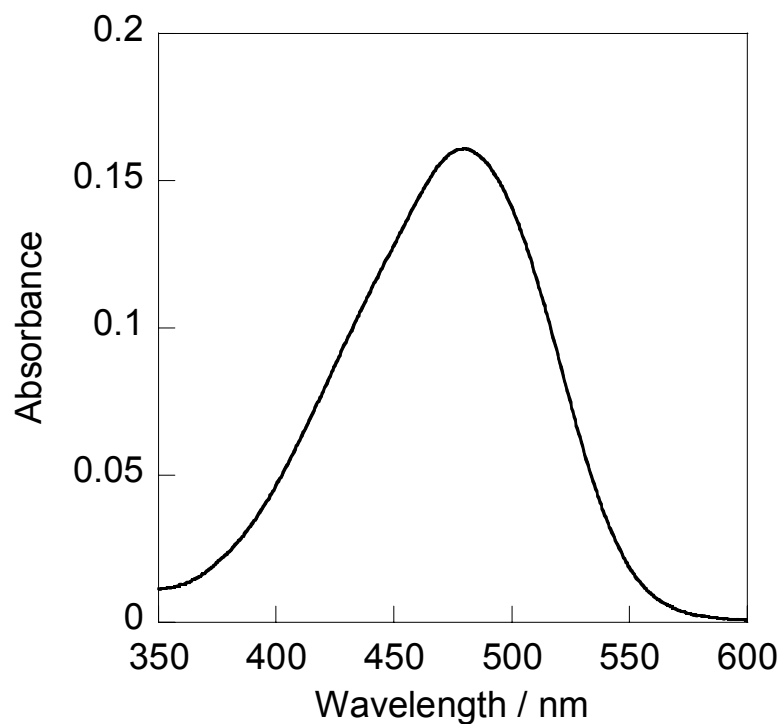

**Figure S1.** UV-Vis spectra of **M1b** at pH 7.0 (10 mM phosphate buffer), 0 °C, in the presence of 100 mM NaCl.

**M1b:** 5'-GAT-TGC-**M**-GAT-ACC-3'

**M** represents Methyl Red moiety as shown below.

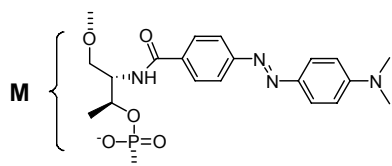

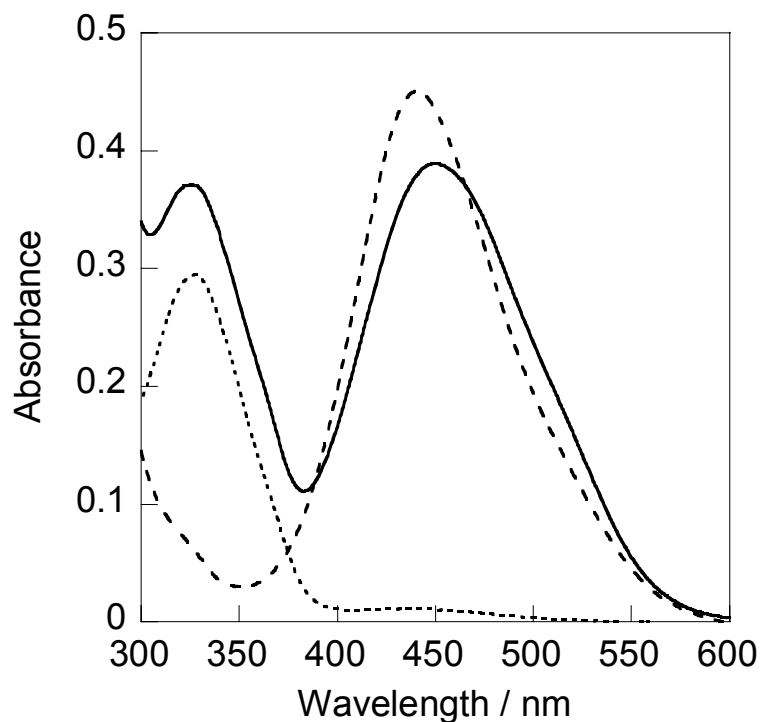

**Figure S2.** UV-Vis spectra of hetero cluster of Methyl Red and azobenzene (**Z3a/M3b**; solid line) , single-stranded **Z3a** (dotted line) and **M3b** (broken line) at 0 °C, pH 7.0 (10 mM phosphate buffer) in the presence of 100 mM NaCl.

**Z3a:** 5'-GGT-ATC-**ZZZ**-GCA-ATC-3'

**M3b:** 5'-GAT-TGC-**MMM**-GAT-ACC-3'

**Z** represents azobenzene moiety as shown below.

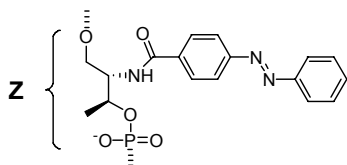

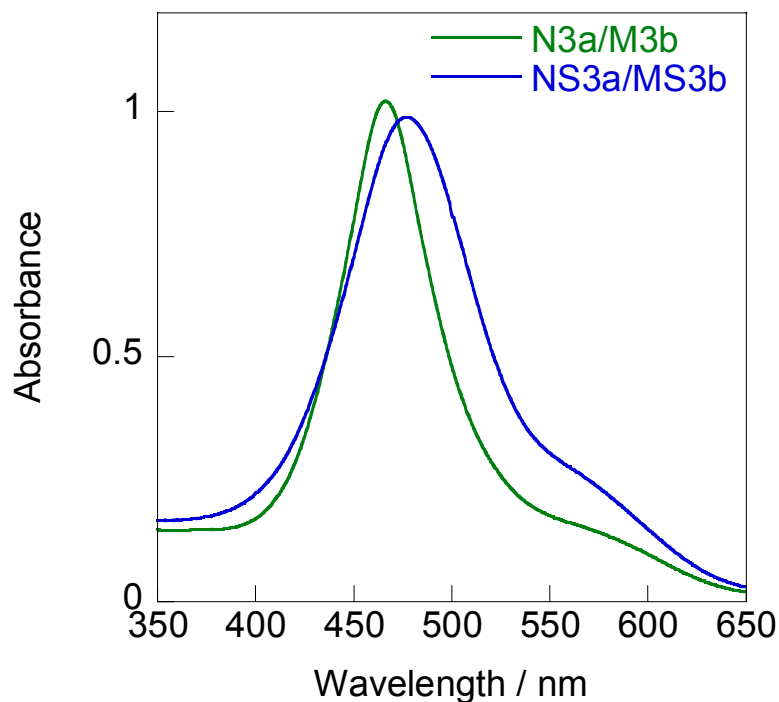

**Figure S3.** UV-Vis spectra of **N3a/M3b** and **NS3a/MS3b** at 0 °C. Solution conditions are as follows: [ODN] = 5  $\mu$ M, [NaCl] = 100 mM, pH 5.0 (10mM MES buffer)

**N3a:** 5'-GGT-ATC-NNN-GCA-ATC-3'

**NS3a:** 5'-GGT-ATC-NSNSNS-GCA-ATC-3'

**M3b:** 5'-GAT-TGC-MMM-GAT-ACC-3'

**MS3b:** 5'-GAT-TGC-MSMSMS-GAT-ACC-3'

N and S represent Naphthyl Red and Spacer moieties as shown below, respectively.

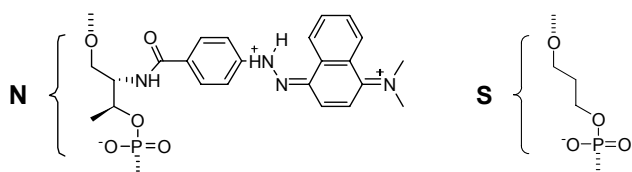

**Table S1.** Effects of the number of Methyl Red/adenine pairs on the melting temperature ( $T_m$ ) and absorption maximum and half-line-width of  $\pi$ - $\pi^*$  transition of Methyl Red.<sup>a)</sup>

| Sequences                                   | $T_m / ^\circ\text{C}$ | $\lambda_{\text{max}} / \text{nm}$ <sup>b)</sup> | Half-line width <sup>b)</sup><br>/ $\text{cm}^{-1}$ |
|---------------------------------------------|------------------------|--------------------------------------------------|-----------------------------------------------------|
| <b>A1a/M1b</b>                              | 39.7                   | 485                                              | 3946                                                |
| <b>A2a/M2b</b>                              | 35.0                   | 462                                              | 4452                                                |
| <b>A3a/M3b</b>                              | 32.4                   | 456                                              | 4381                                                |
| <b>A4a/M4b</b>                              | 29.5                   | 442                                              | 4487                                                |
| <b>A5a/M5b</b>                              | 24.8                   | 441                                              | 4751                                                |
| <b>A6a/M6b</b>                              | 16.4                   | 422                                              | 4890                                                |
| <hr style="border-top: 1px dashed black;"/> |                        |                                                  |                                                     |
| <b>T5a/M5b</b>                              | 27.9                   | 441                                              | 4852                                                |
| <b>C5a/M5b</b>                              | 27.9                   | 442                                              | 4845                                                |
| <b>G5a/M5b</b>                              | 27.9                   | 437                                              | 4891                                                |

a) Solution conditions: [ODN] = 5  $\mu\text{M}$ , [NaCl] = 100 mM, pH 7.0 (10 mM phosphate buffer)

b) UV-Vis spectrum was measured at 0  $^\circ\text{C}$ .

**Ana:** 5'-GGT-ATC-A<sub>n</sub>-GCA-ATC-3' ( $n = 1-6$ )

**Mnb:** 5'-GAT-TGC-M<sub>n</sub>-GAT-ACC-3' ( $n = 1-6$ )

**T5a:** 5'-GGT-ATC-T<sub>5</sub>-GCA-ATC-3'

**C5a:** 5'-GGT-ATC-C<sub>5</sub>-GCA-ATC-3'

**G5a:** 5'-GGT-ATC-G<sub>5</sub>-GCA-ATC-3'

**M** represents Methyl Red moiety as shown in Figure S1.
